# Supplementary material for: Comparing Apples and Oranges?: Next Generation Sequencing and Its Impact on Microbiome Analysis
Source: PubMed Central journal article supplement (PMC4746063; doi:10.1371/journal.pone.0148028), 2016-02-05

● Hiseq    ● Miseq    ● PGM

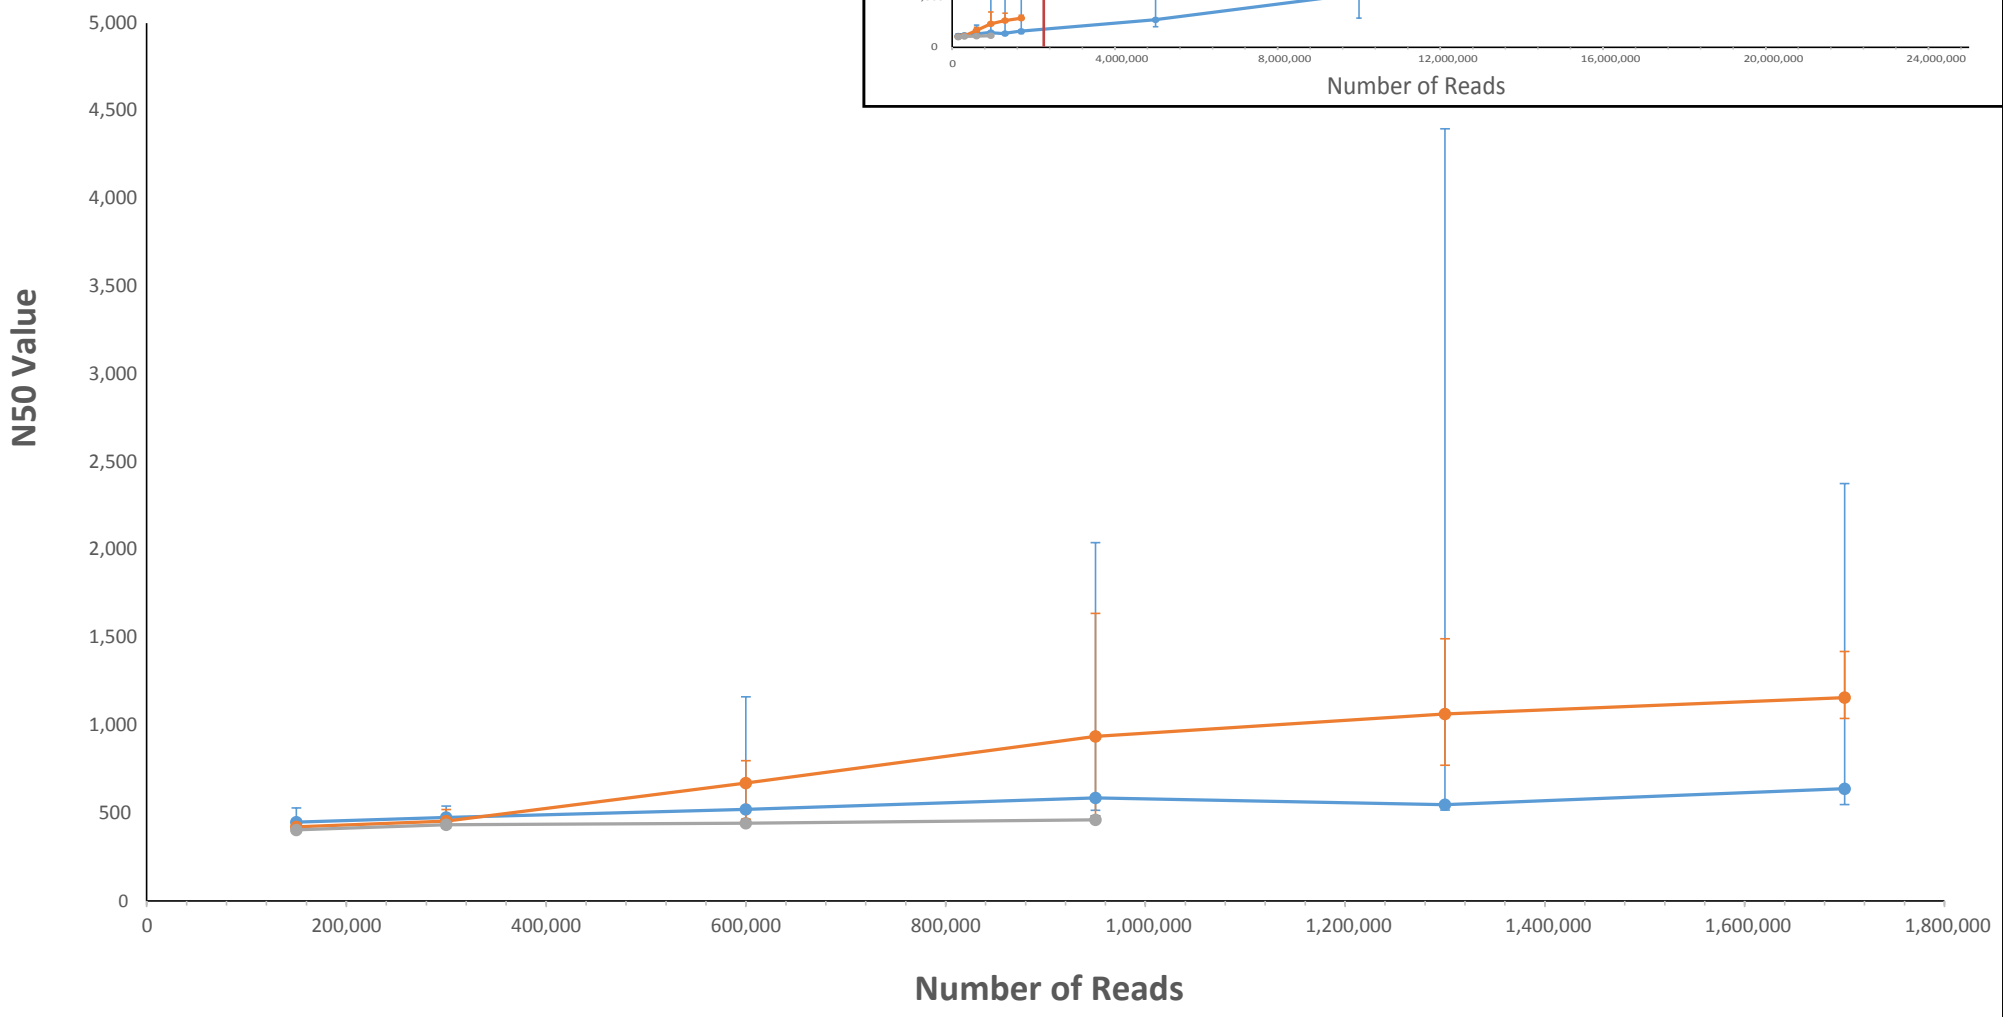

Supplement: pone.0148028.s001.pdf [file pone.0148028.s001.pdf]
